# Supplementary material for: Synaptotagmins interact with APP and promote Aβ generation
Source: PubMed Central journal article supplement (PMC4511450; doi:10.1186/s13024-015-0028-5), 2015-07-23
Supplement: 13024_2015_28_MOESM1_ESM.pdf [file 13024_2015_28_MOESM1_ESM.pdf]

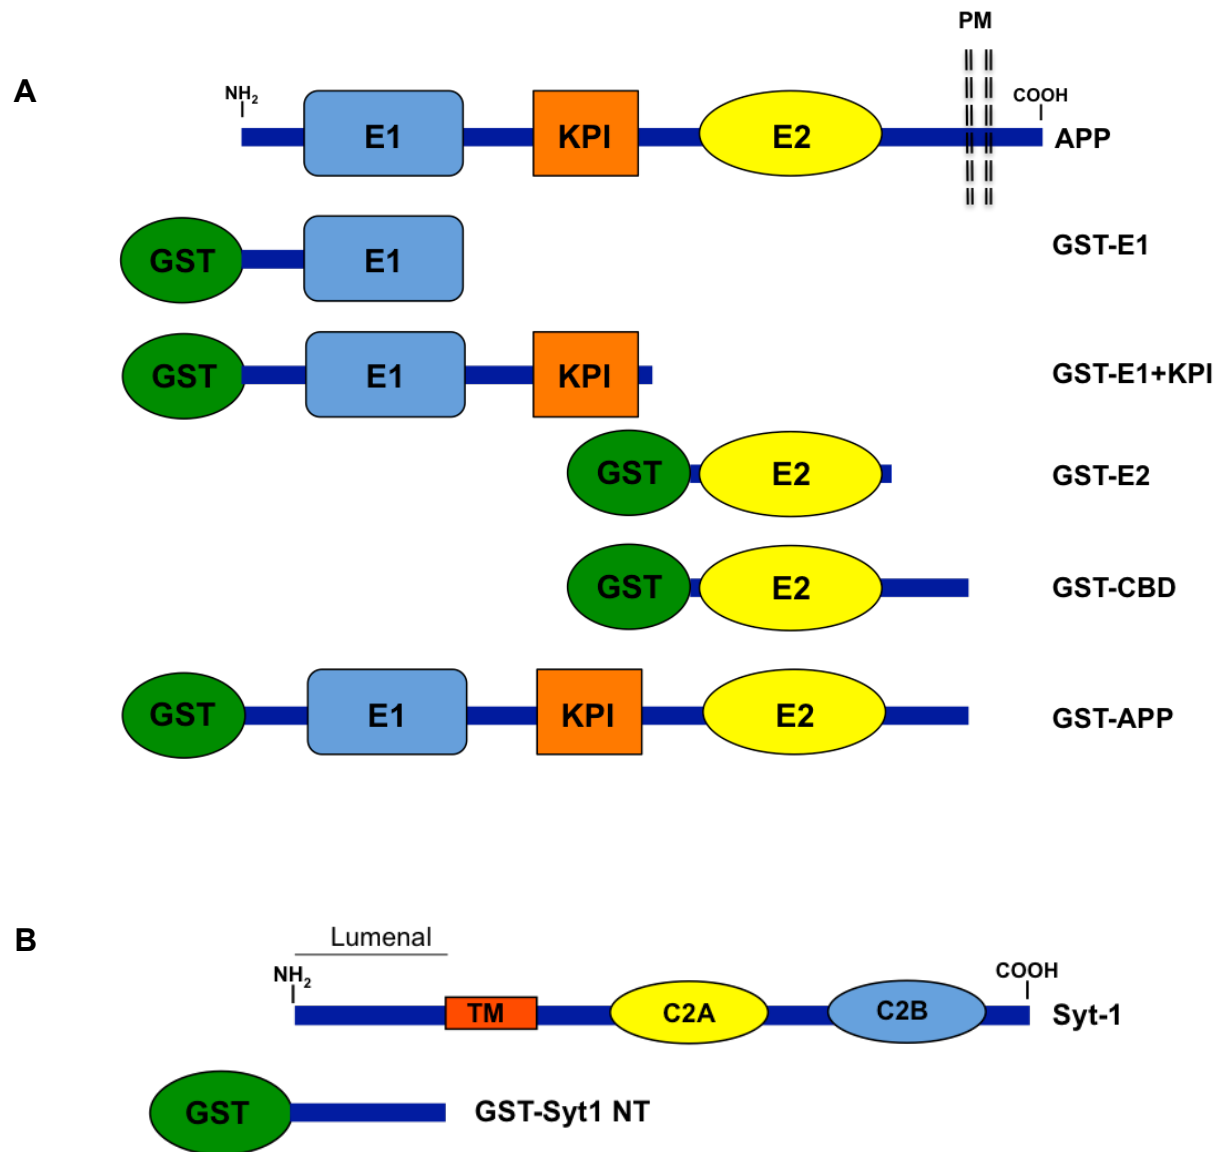

Fig S1. Schematic representation of GST-tagged APP and Syt-1 ectodomain

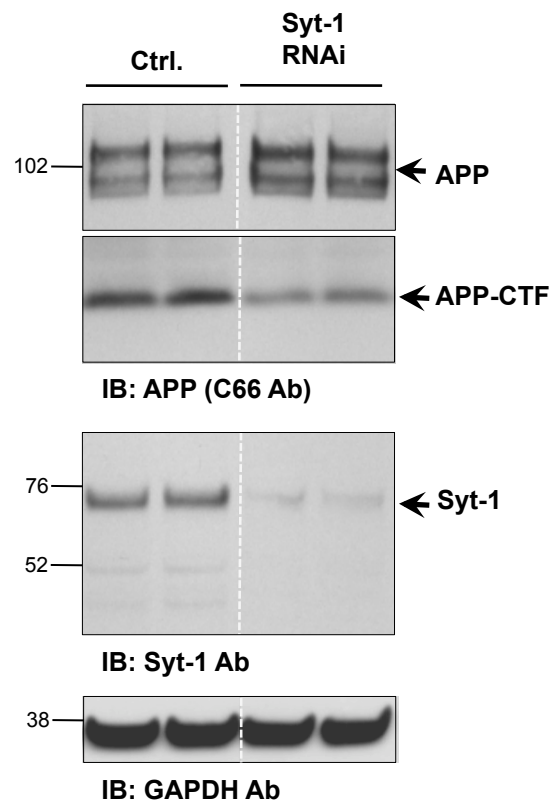

Fig S2. Syt-1 siRNA decreases endogenous APP CTF levels in PC12 cells

## **Supplementary Figure Legends**

### **Figure S1. Schematic representation of GST-tagged APP and Syt-1 ectodomain**

(S1A) Schematic diagram of APP structure (*top*) and GST-tagged APP ectodomain (*bottom*) constructs used in MS-based identification of APP-interacting proteome from mouse brain.

(S1B) Schematic representation of Syt-1 structure (*top*) and GST-tagged Syt-1 N-terminal (luminal region) construct.

### **Figure S2. Syt-1 siRNA decreases endogenous APP-CTF levels in PC12 cells**

Western blot analysis of PC12 cells transiently transfected with Syt-1 specific siRNA shows lower APP-CTF levels as compared to the control cells. Top panel shows full-length APP and APP-CTF levels while bottom panel shows Syt-1 expression. GAPDH staining was used for equal protein loading.
